# Supplementary material for: Atg7-dependent canonical autophagy regulates the degradation of aquaporin 2 in prolonged hypokalemia
Source: PubMed Central journal article supplement (PMC6395725; doi:10.1038/s41598-019-39702-4), 2019-02-28
Supplement: 41598_2019_39702_MOESM1_ESM.pdf [file 41598_2019_39702_MOESM1_ESM.pdf]

***Atg7*-dependent canonical autophagy regulates the degradation of aquaporin 2 in prolonged hypokalemia**

Wan-Young Kim<sup>1</sup>, Sun Ah Nam<sup>1</sup>, Arum Choi<sup>1</sup>, Yu-Mi Kim<sup>1</sup>, Sang Hee Park<sup>2</sup>, Hong Lim Kim<sup>3</sup>, Hyang Kim<sup>4</sup>, Ki-Hwan Han<sup>5</sup>, Chul Woo Yang<sup>6</sup>, Myung-Shik Lee<sup>7</sup>, Yong Kyun Kim<sup>1,6</sup> & Jin Kim<sup>1</sup>

<sup>1</sup>Department of Anatomy and Cell Death Disease Research Center, College of Medicine, The Catholic University of Korea, Seoul, Korea. <sup>2</sup>Institute of Clinical Medicine Research of Bucheon St. Mary's Hospital, Bucheon, Korea. <sup>3</sup>Integrative Research Support Center, College of Medicine, The Catholic University of Korea, Seoul, Korea. <sup>4</sup>Division of Nephrology, Kangbuk Samsung Hospital, Sungkyunkwan University, School of Medicine, Seoul, Korea. <sup>5</sup>Department of Anatomy, Ewha Womans University School of Medicine, Seoul, Korea. <sup>6</sup>Department of Internal Medicine, College of Medicine, The Catholic University of Korea, Seoul, Korea. <sup>7</sup>Severance Biomedical Science Institute, College of Medicine, Yonsei University, Seoul, Korea.

Correspondence: Jin Kim, M.D., Ph.D.

Address: Department of Anatomy and Cell Death Disease Research Center, College of Medicine, The Catholic University of Korea, Seoul, Korea, 222 Banpo-Daero, Seocho-Ku, Seoul, 06591, Korea

Telephone: 82-2-2258-7258

Fax: 82-2-536-3110

E mail: [jinkim@catholic.ac.kr](mailto:jinkim@catholic.ac.kr)

Correspondence: Yong Kyun Kim, M.D., Ph.D.

Address: Department of Internal Medicine, Bucheon St. Mary's Hospital, College of Medicine,  
The Catholic University of Korea, 327 Sosa-ro, Bucheon, Gyeonggi-do, 14647 Korea

Telephone: 82-32-340-7019

Fax: 82-32-340-2667

E mail: [drkimyk@catholic.ac.kr](mailto:drkimyk@catholic.ac.kr)

## Supplementary Information

**Supplementary Table S1.** Effect of AQP2-specific deficiency of *Atg7* on kidney weight and biochemical parameters.

|        |                                        | <i>Atg7<sup>fl/fl</sup></i> |                          | <i>Atg7<sup>ΔPC</sup></i> |                               |
|--------|----------------------------------------|-----------------------------|--------------------------|---------------------------|-------------------------------|
|        |                                        | Control                     | K <sup>+</sup> -depleted | Control                   | K <sup>+</sup> -depleted      |
|        | Body weight (g)                        | 22.5 ± 0.5                  | 19.5 ± 1.26**            | 24.5 ± 1.63**             | 23.3 ± 1.31 <sup>+</sup>      |
| Weight | Kidney weight (g)                      | 0.16 ± 0.01                 | 0.15 ± 0.02              | 0.17 ± 0.02               | 0.19 ± 0.02**/+               |
|        | KW/BW (%)                              | 100 ± 8.43                  | 115.15 ± 10.10*          | 108.65 ± 1.38             | 123.88 ± 8.05*/#              |
| Blood  | Plasma Na <sup>+</sup> (mmol/L)        | 150.2 ± 1.8                 | 147.4 ± 2.1              | 150.2 ± 2.0               | 153.2 ± 2.1 <sup>*/+/#</sup>  |
|        | Plasma K <sup>+</sup> (mmol/L)         | 3.89 ± 0.32                 | 2.97 ± 0.26**            | 4.27 ± 0.30               | 2.28 ± 0.25**/+/#             |
|        | Plasma Cl <sup>-</sup> (mmol/L)        | 112.8 ± 2.4                 | 113.3 ± 1.5              | 114.2 ± 3.8               | 119.5 ± 4.1 <sup>*/+/#</sup>  |
|        | BUN (mg/dL)                            | 27.2 ± 5.9                  | 30.8 ± 4.49              | 27.0 ± 2.65               | 47.00 ± 7.79 <sup>*/+/#</sup> |
|        | Urine volume (ml)                      | 0.56 ± 0.37                 | 2.48 ± 1.36**            | 2.37 ± 0.67**             | 3.02 ± 0.81 <sup>**/+/#</sup> |
|        | Osmolality (mosmol/kgH <sub>2</sub> O) | 2244.1 ± 421                | 1168.1 ± 418**           | 1525.7 ± 401**            | 974 ± 185 <sup>**/+/#</sup>   |
| Urine  | Urine Na <sup>+</sup> (mmol/L)         | 70.7 ± 18.0                 | 38.1 ± 16.8*             | 52.1 ± 20.0*              | 26.9 ± 6.2 <sup>*/+/#</sup>   |
|        | Urine K <sup>+</sup> (mmol/L)          | 137.6 ± 16.3                | 13.7 ± 6.0**             | 105.2 ± 32.2**            | 15.3 ± 3.7 <sup>**/#</sup>    |
|        | Urine Cl <sup>-</sup> (mmol/L)         | 132.1 ± 31.1                | 61.3 ± 24.9*             | 95.9 ± 33.2*              | 67.9 ± 18.0 <sup>*/+/#</sup>  |

t-test vs. *Atg7<sup>fl/fl</sup>* Control      \* *P* < 0.05, \*\* *P* < 0.001

t-test vs. *Atg7<sup>fl/fl</sup>* K<sup>+</sup>-depleted    + *P* < 0.05, ++ *P* < 0.001

t-test vs. *Atg7<sup>ΔPC</sup>* Control      # *P* < 0.05, ## *P* < 0.001

All values are the means ± SEM.

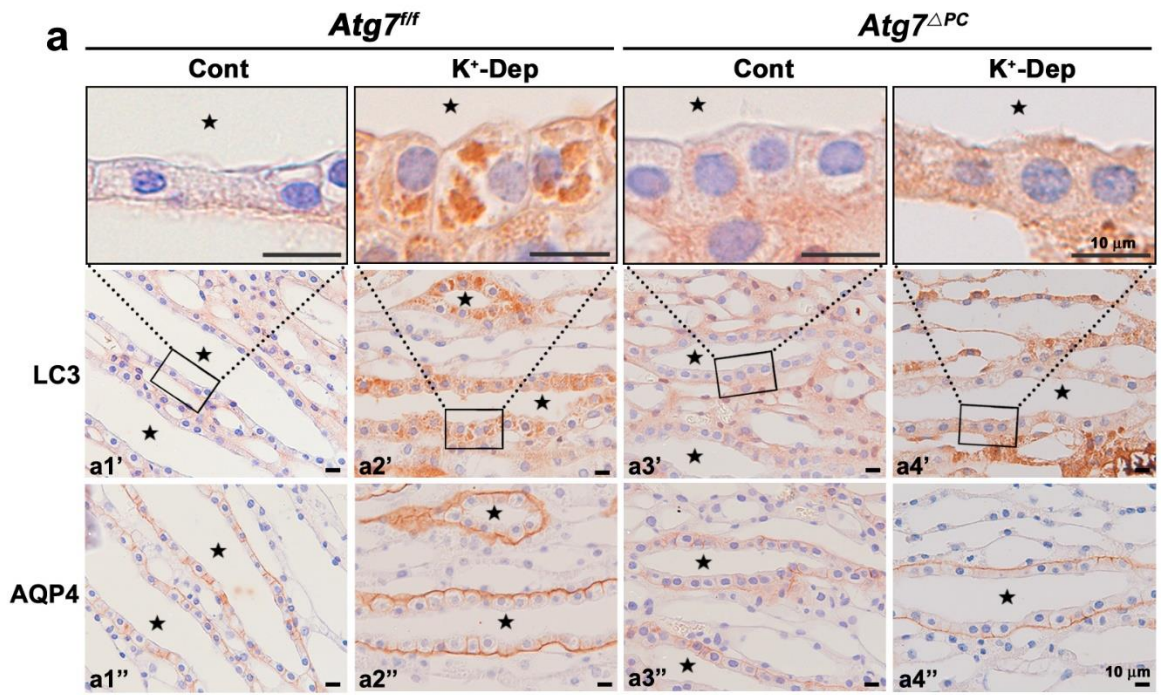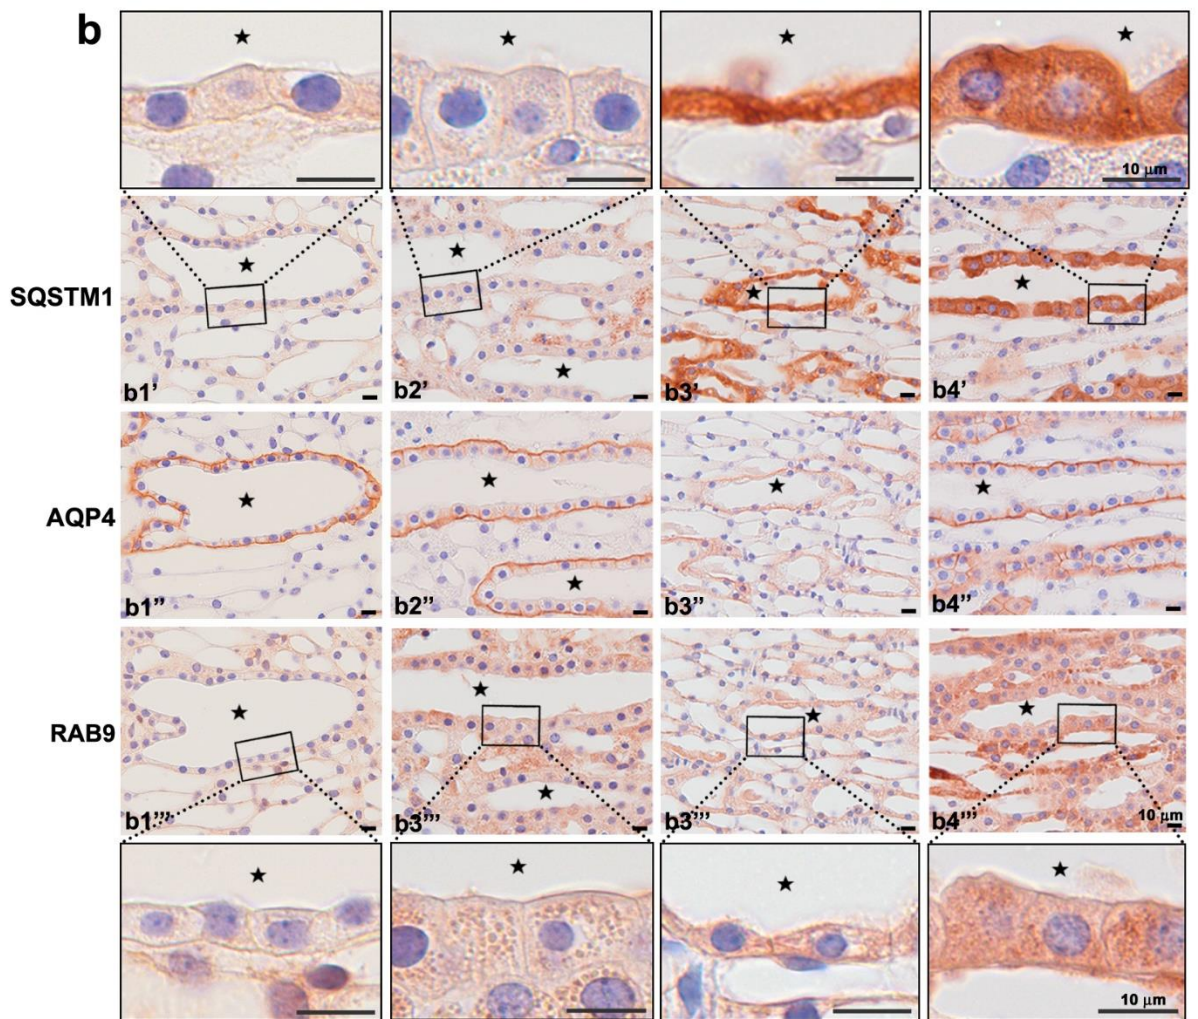

**Figure S1.** Light micrographs of the inner medulla of control (Cont) and K<sup>+</sup>-depleted (K<sup>+</sup>-Dep) *Atg7<sup>f/f</sup>* and *Atg7<sup>ΔPC</sup>* mouse kidneys illustrating immunolabeling of LC3 (**a1'-a4'**), SQSTM1 (**b1'-b4'**) and RAB9 (**b1'''-b4'''**). Inner medullary collecting ducts (IMCDs) (stars) were identified by immunolabeling on the basolateral plasma membrane for AQP4 using consecutive sections (**a1''-a4''**) and (**b1''-b4''**). **(a)** In the images, it can be observed that the intense immunoreactivity for LC3 in K<sup>+</sup>-Dep *Atg7<sup>f/f</sup>* mice is markedly and restrictively decreased in the AQP4-positive IMCD cells in K<sup>+</sup>-Dep *Atg7<sup>ΔPC</sup>* mice. **(b)** Strong immunoreactivity for SQSTM1 is observed restrictively in the AQP4-positive IMCD cells of *Atg7<sup>ΔPC</sup>* mice. Note the prominent increase of RAB9 in K<sup>+</sup>-Dep *Atg7<sup>ΔPC</sup>* mice. Boxes in **(a, b)** are higher magnification of the areas indicated by the rectangles in upper or lower panels.



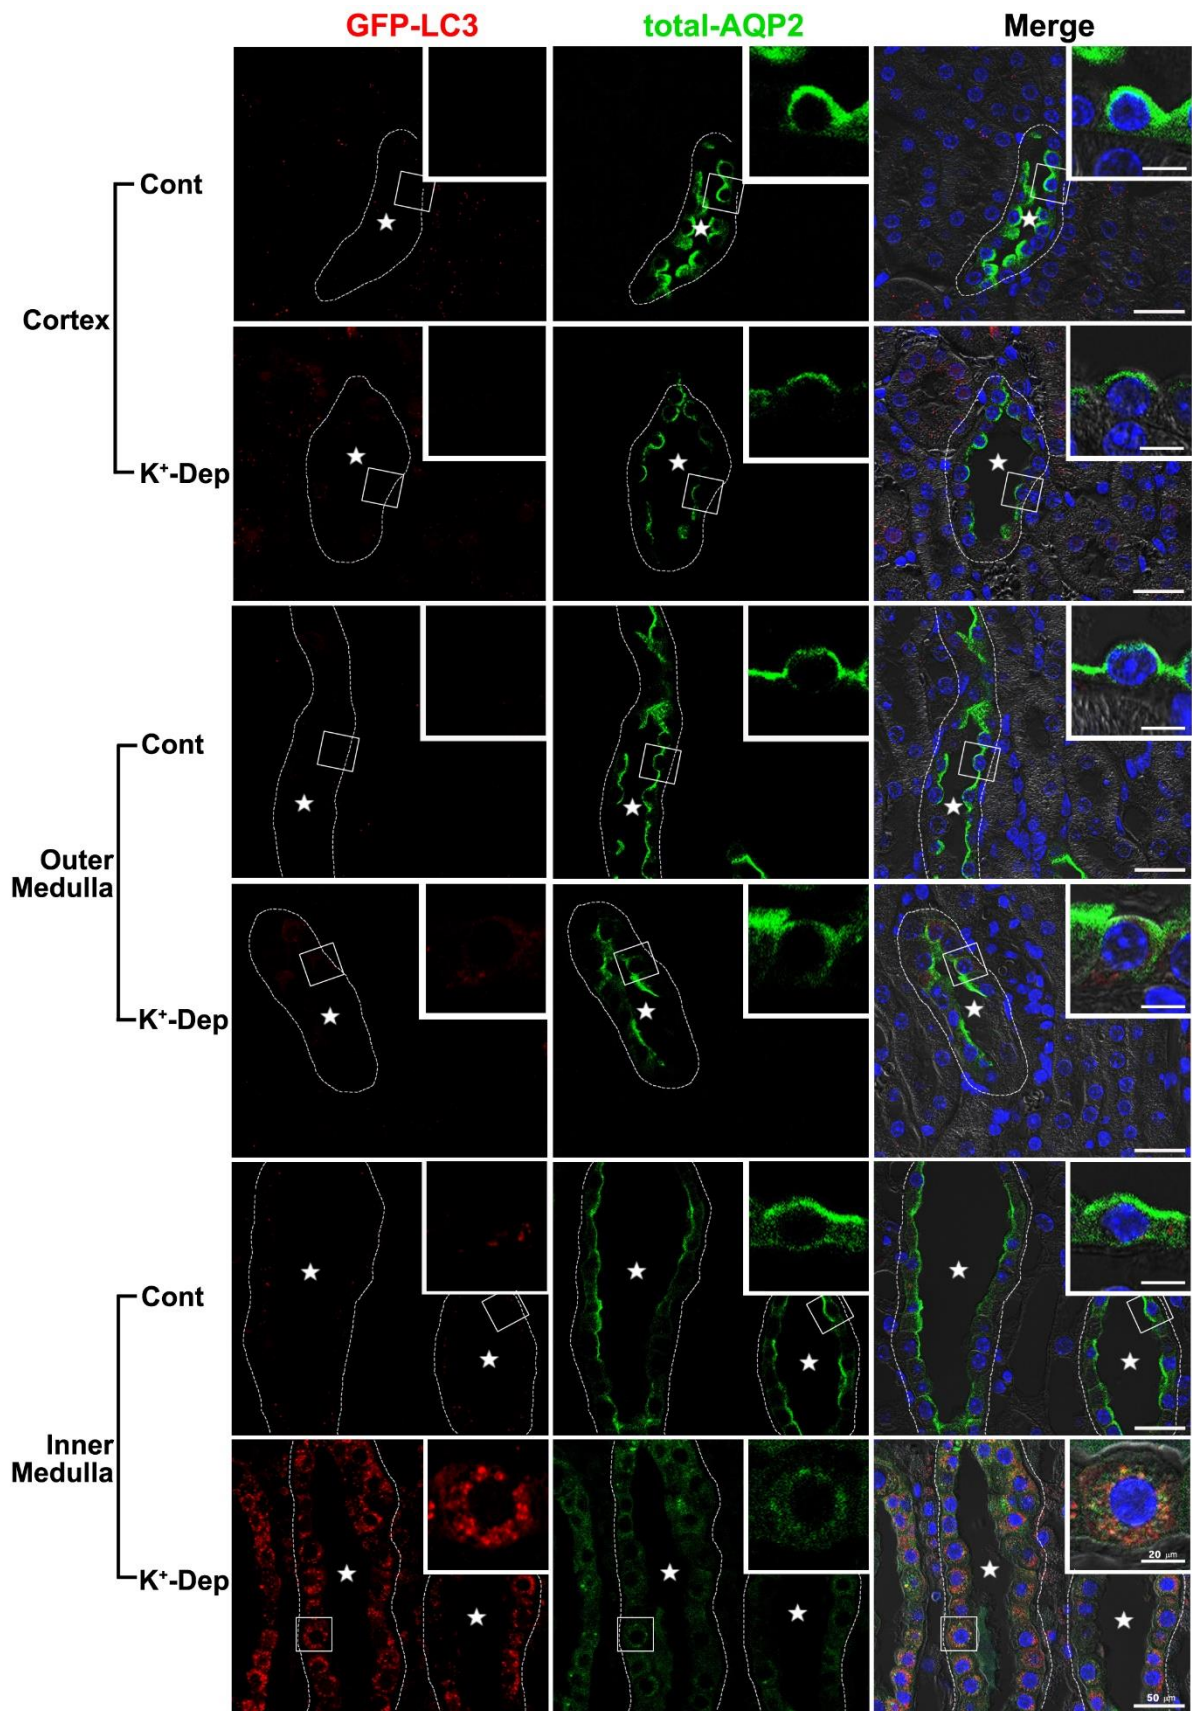

**Figure S2.** Confocal micrographs of the cortex, outer and inner medulla of control (Cont) and

K<sup>+</sup>-depleted (K<sup>+</sup>-Dep) GFP-LC3 transgenic mice illustrating double labeling with GFP-LC3 (red) and total-AQP2 (green). After potassium depletion for 2 weeks, GFP-LC3-positive dots are markedly accumulated in the inner medullary collecting duct (IMCD) cells, but a few in both cortical and outer medullary collecting duct cells. Note that total-AQP2 is colocalized with these GFP-LC3-positive puncta in the IMCD cells. Stars indicate the lumen of collecting ducts.

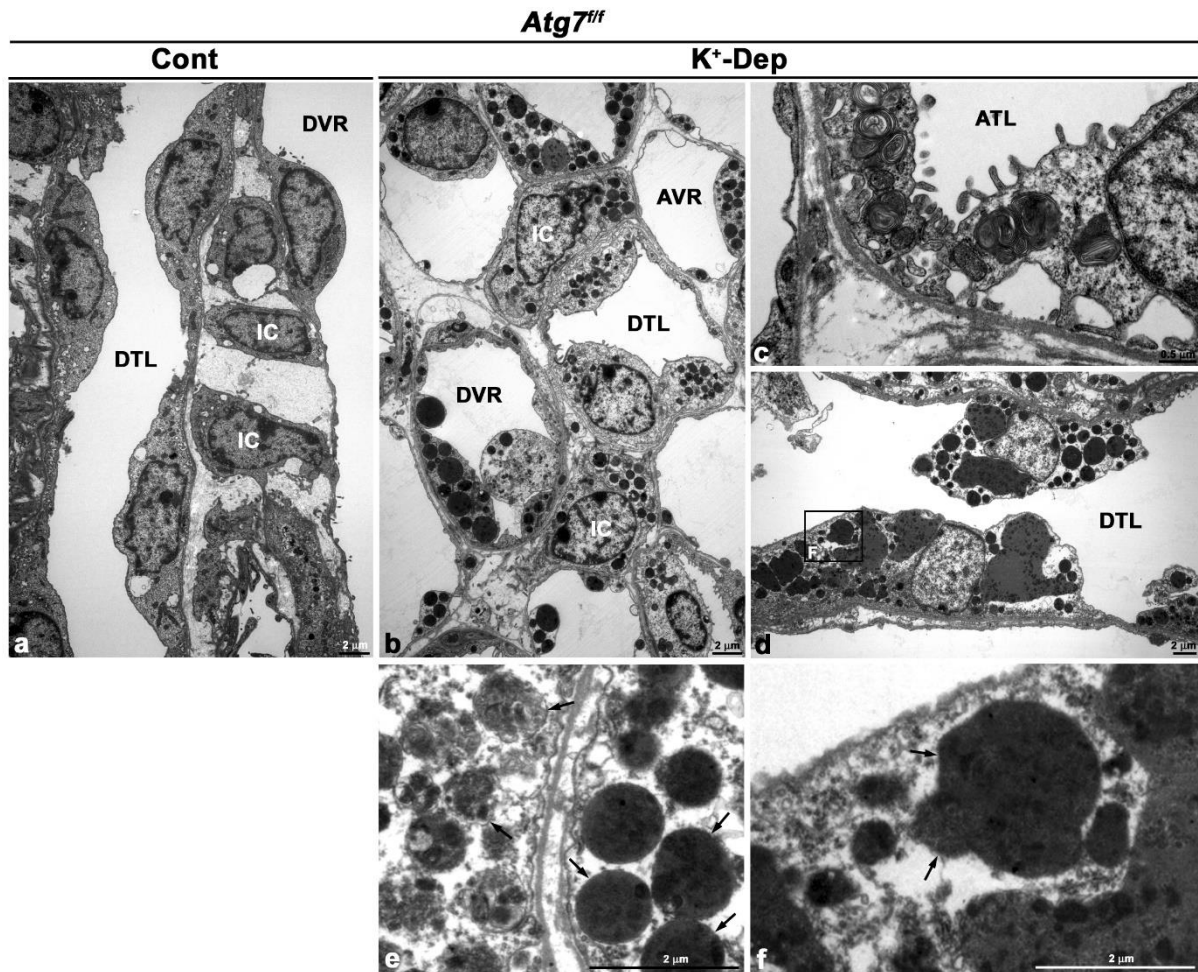

**Figure S3.** Transmission electron micrographs of the inner medulla of *Atg7<sup>f/f</sup>* mouse kidneys. **(a)** On normal diet (Cont), no autophagic vacuoles are observed in the cytoplasm of interstitial cell (IC), descending thin limb (DTL), or descending vasa recta (DVR). **(b-f)** After K<sup>+</sup>-depletion (K<sup>+</sup>-Dep), the accumulation of numerous autophagic vacuoles containing multilamellar bodies or degradation materials can be observed in the IC, DTL, ascending thin limb (ATL), DVR, and ascending vasa recta (AVR). **(f)** Higher magnifications of the areas outlined in **(d)**. A single membrane (arrows) can be observed surrounding various autophagic vacuoles.



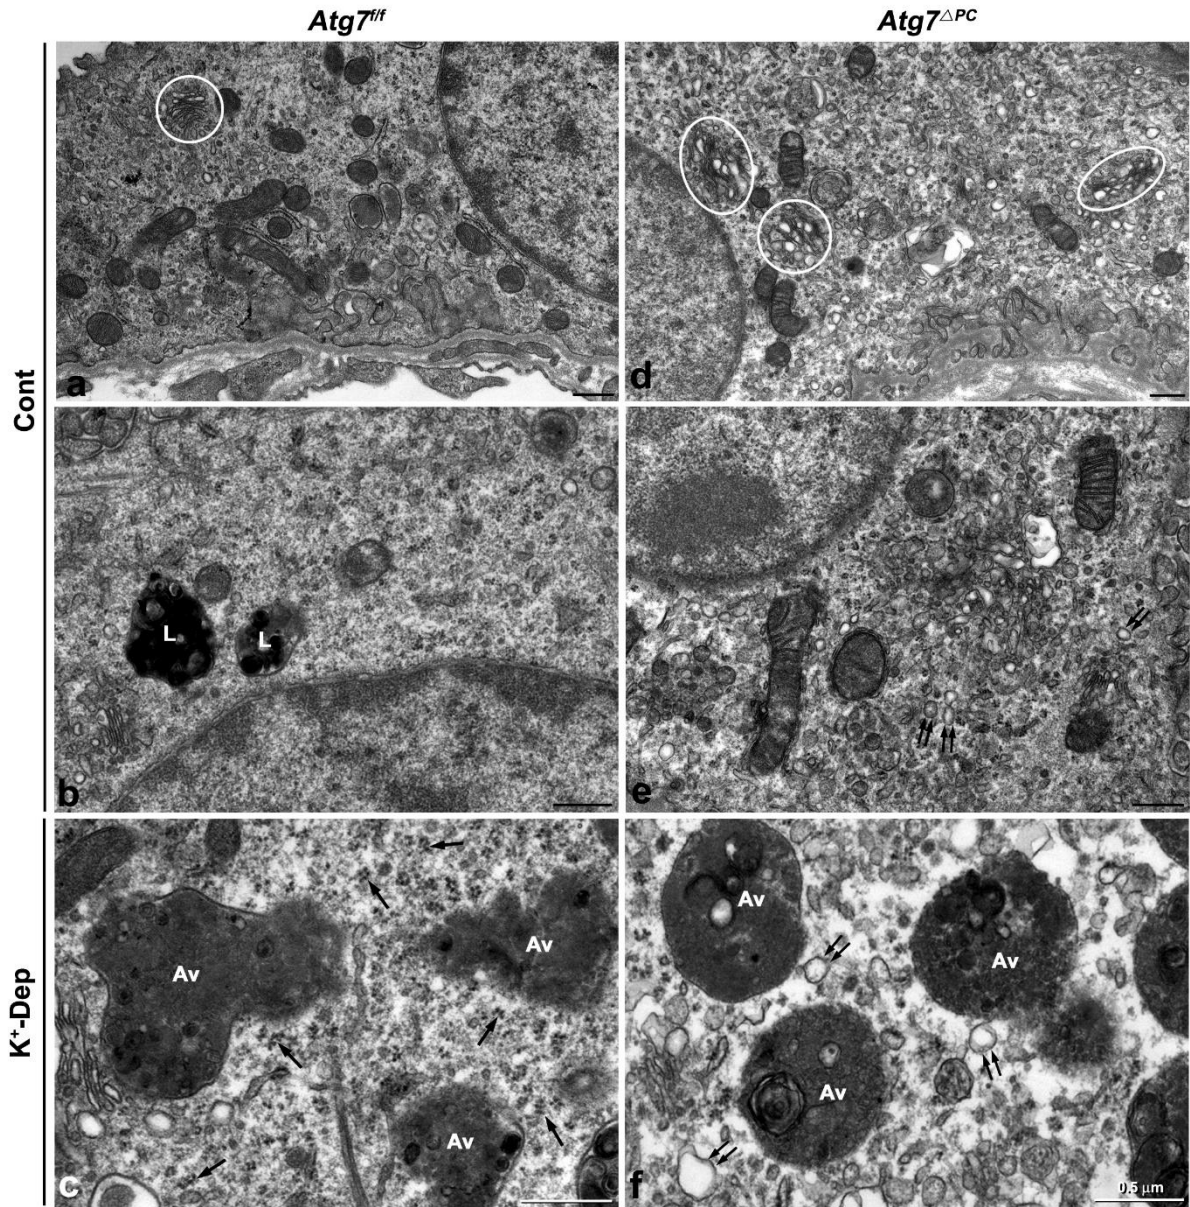

**Figure S4.** Transmission electron micrographs of inner medullary collecting duct (IMCD) cells. **(a-c)** In *Atg7<sup>fl/fl</sup>* mice, polysomes (arrows) are markedly increased throughout the cytoplasm in IMCD cells, as are autophagic vacuoles (Av) after K<sup>+</sup>-depletion (K<sup>+</sup>-Dep). **(d-f)** In *Atg7<sup>ΔPC</sup>* mice, in contrast, Golgi complexes (circles) and small tubuloalveolar shaped vesicles (double arrows) are markedly increased in both control (Cont) and K<sup>+</sup>-Dep groups.

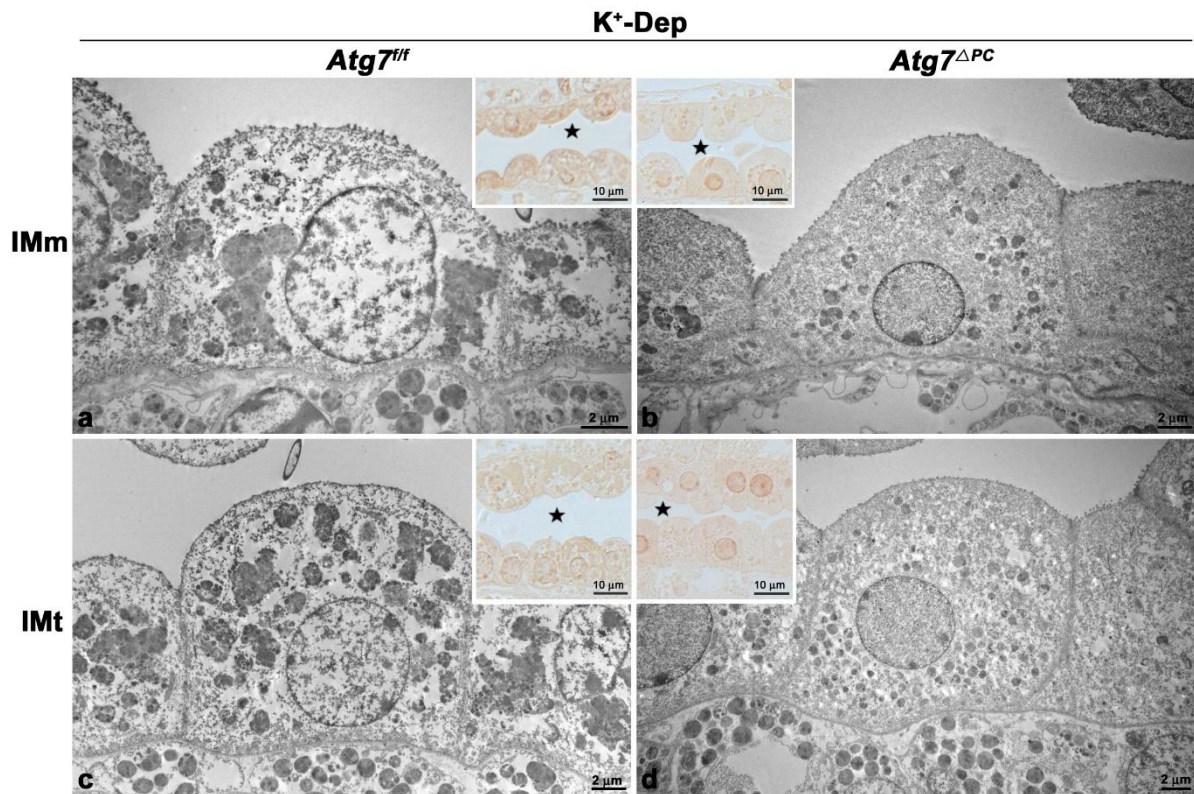

**Figure S5.** Immunoelectron micrographs of the middle (IMm). **(a, b)** and the terminal (IMt). **(c, d)** parts of the inner medulla of K<sup>+</sup> depleted (K<sup>+</sup>-Dep) *Atg7<sup>f/f</sup>*. **(a, c)** and *Atg7<sup>ΔPC</sup>* **(b, d)** mice illustrating immunostaining for pS256-AQP2. The inserts are light micrographs of 1 μm-thick semi-thin sections of the same group. No immunoreactivity of pS256-AQP2 is observed in either the canonical autophagic vacuoles in K<sup>+</sup>-Dep *Atg7<sup>f/f</sup>* mice **a, c** or the non-canonical autophagic vacuoles in K<sup>+</sup>-Dep *Atg7<sup>ΔPC</sup>* mice **(b, d)**. Stars indicate the lumen of inner medullary collecting ducts **(a-d)**.

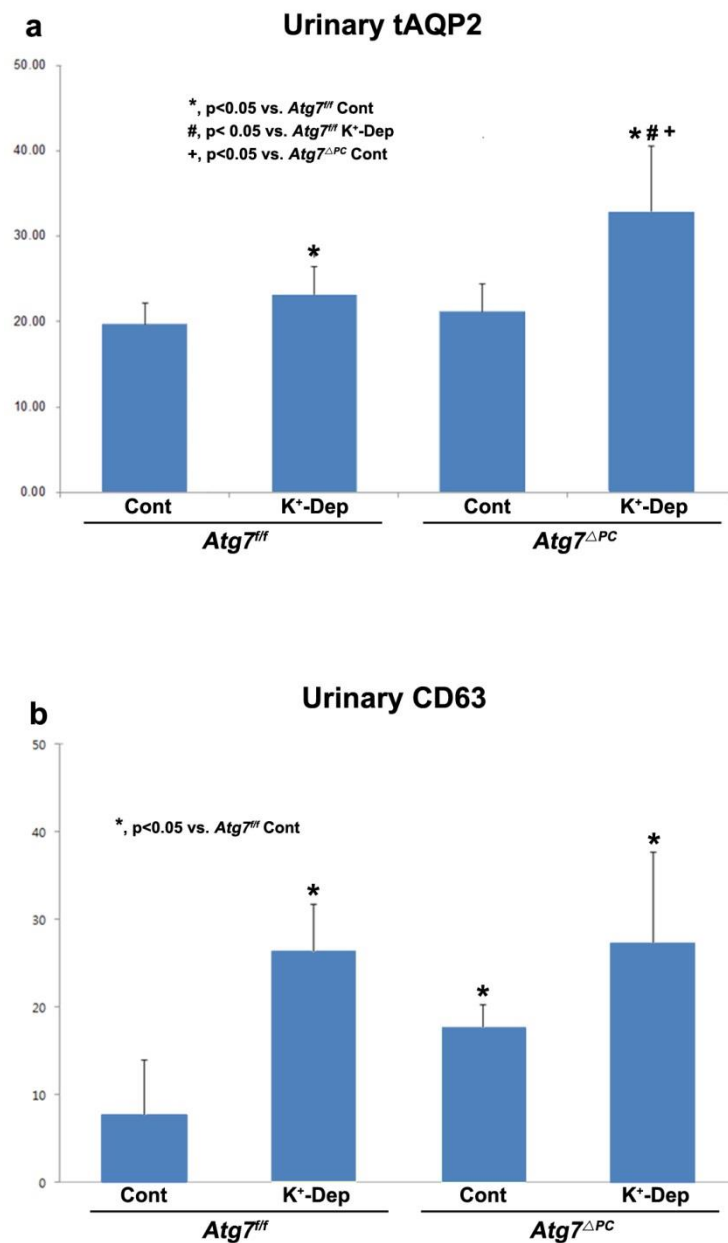

**Figure S6.** Enzyme-linked immunosorbent assay of urinary total-AQP2 (a) and CD63 (b). Note that urinary excretion of total-AQP2 and CD63 are significantly increased after K<sup>+</sup> depletion in both *Atg7<sup>fl/fl</sup>* mice and *Atg7<sup>ΔPC</sup>* mice compare to those of control mice.
